# Supplementary material
Source: Springer Nature journal article supplement (https://www.springermedizin.de/resource/supplementary/12936_2009_1143_MOESM4_ESM.pdf/9549962)

Percentage of houses with  
at least one bed net

—□— Asembo    -▲- Seme

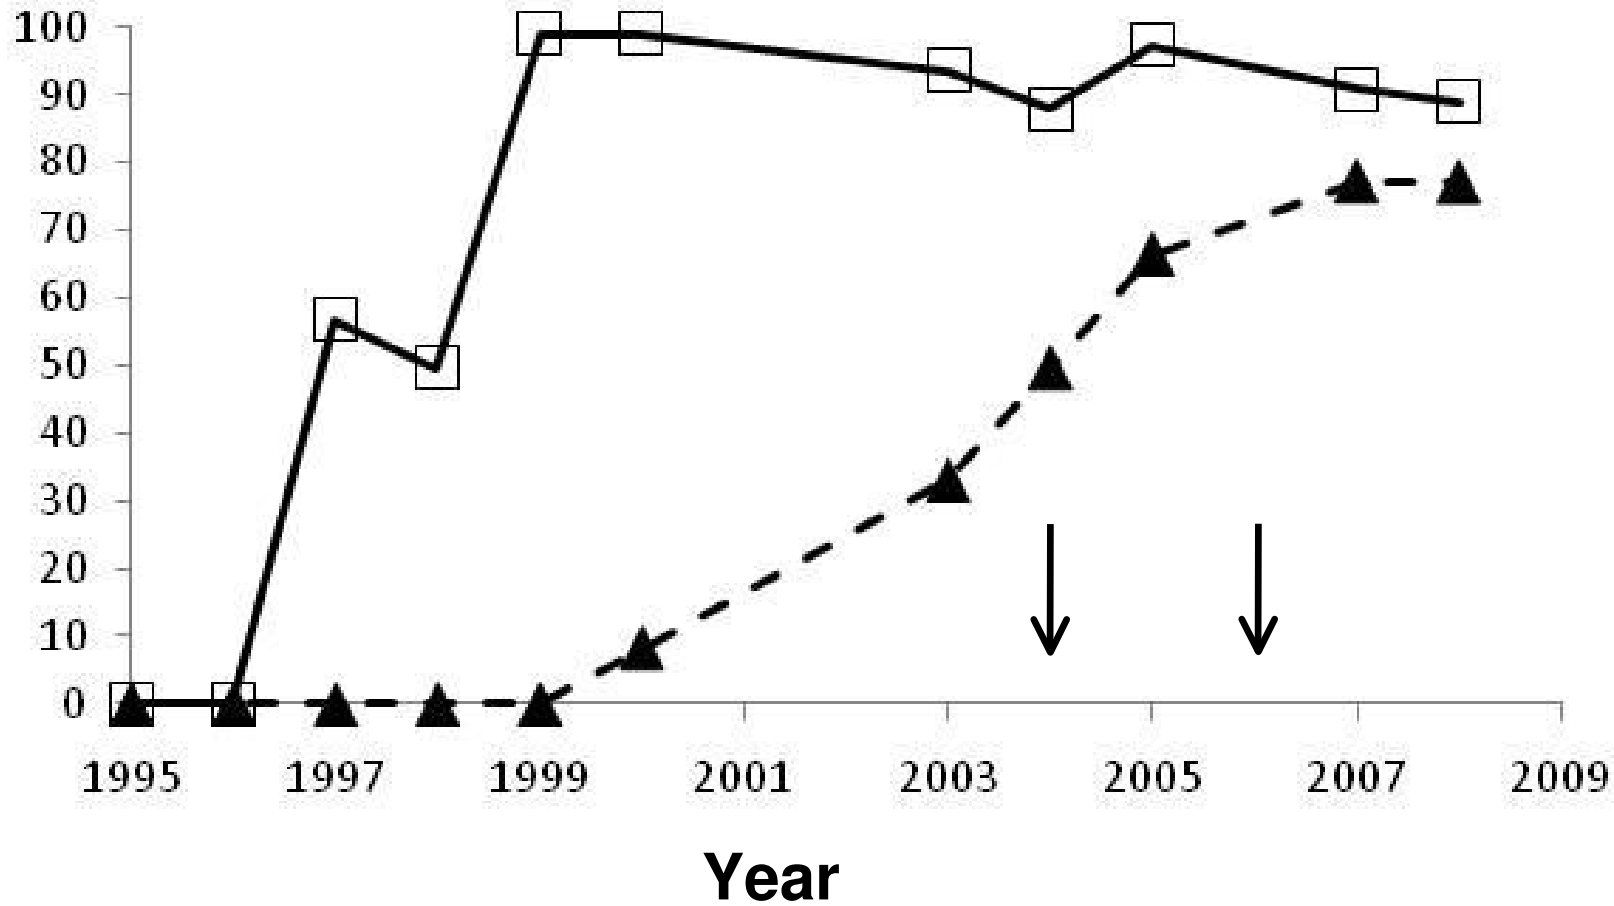

Supplement: MOESM4 [file 9549962]
